# Supplementary material for: Improving model-satellite comparisons of sea ice melt onset with a satellite simulator
Source: Copernicus journal article supplement (doi:10.5194/tc-16-3235-2022), 2022-08-12
Supplement: Supplementary file 1 [file tc-16-3235-2022-supplement.pdf]

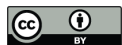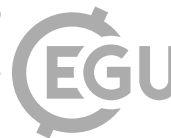

## *Supplement of*

# **Improving model-satellite comparisons of sea ice melt onset with a satellite simulator**

**Abigail Smith et al.**

*Correspondence to:* Abigail Smith ([abigail.l.smith@colorado.edu](mailto:abigail.l.smith@colorado.edu))

The copyright of individual parts of the supplement might differ from the article licence.

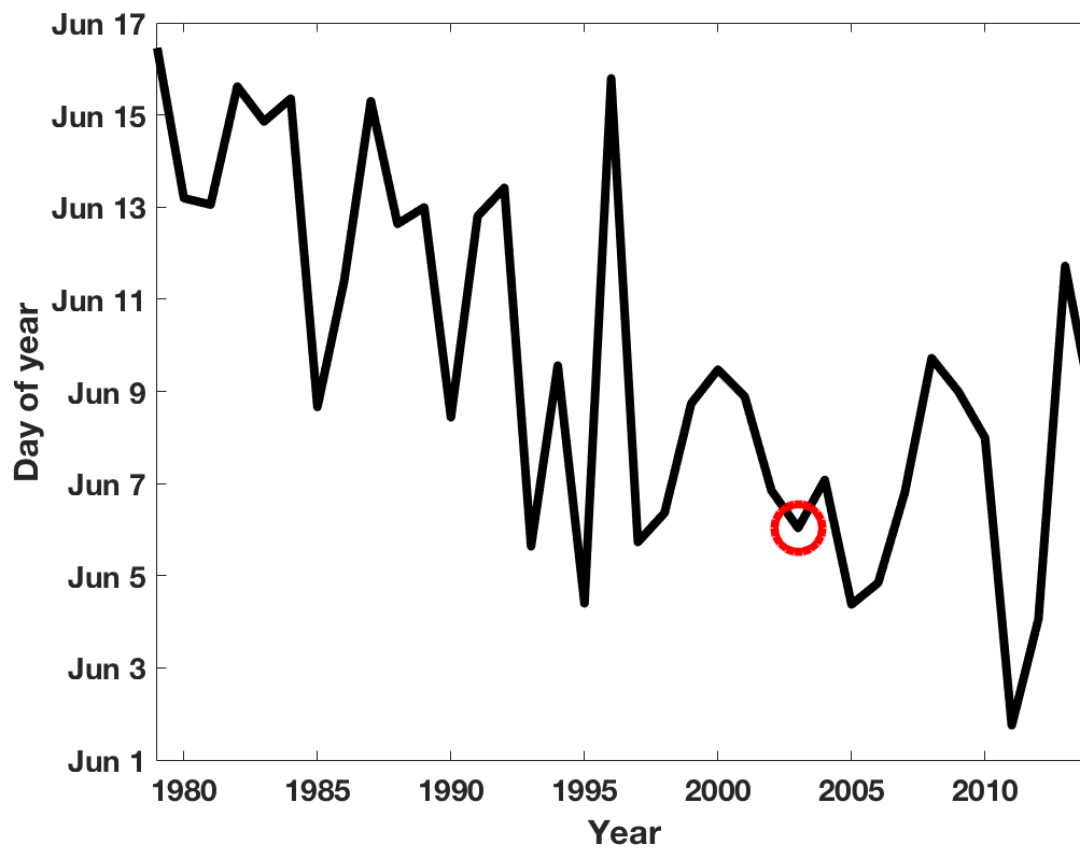

**Figure S1.** Average pan-Arctic melt onset dates north of 66 °N from 1979-2014. The year utilized for this analysis, 2003, is circled in red.

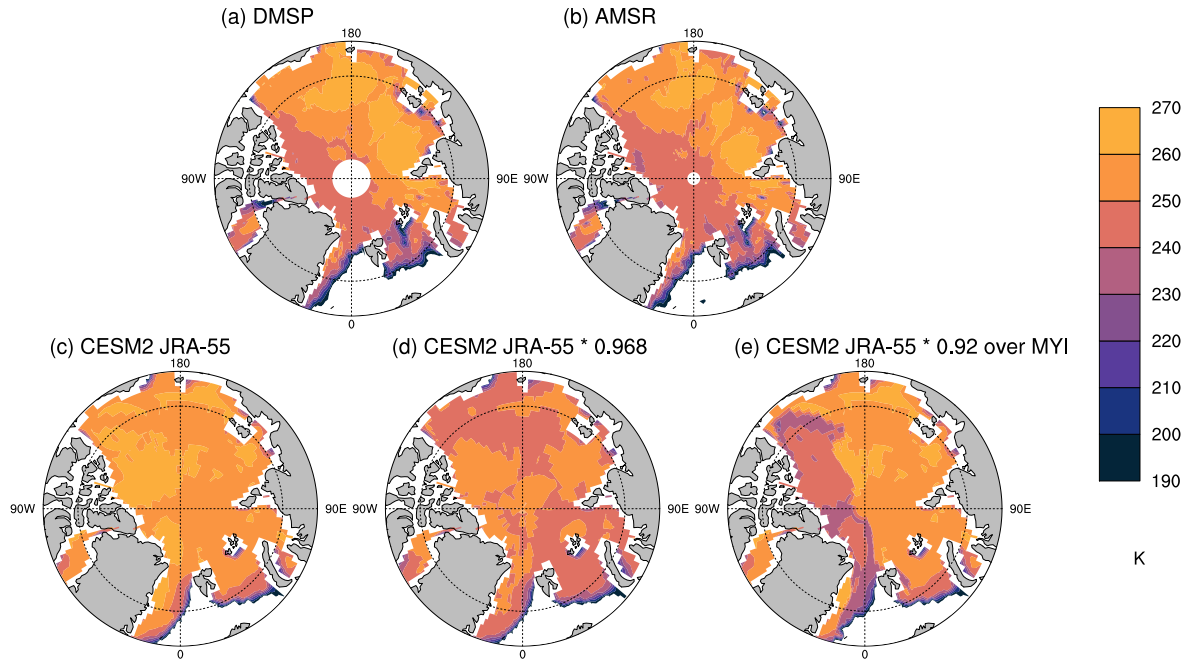

**Figure S2.** Brightness temperatures on June 1, 2003 using (a) DMSP (b) AMSR (c) CESM JRA-55 and (d) CESM2 JRA-55 with 0.968 correction as in Burgard et al. (2020a, b) and (e) CESM2 JRA-55 with 0.92 correction applied only to areas of multi-year ice.

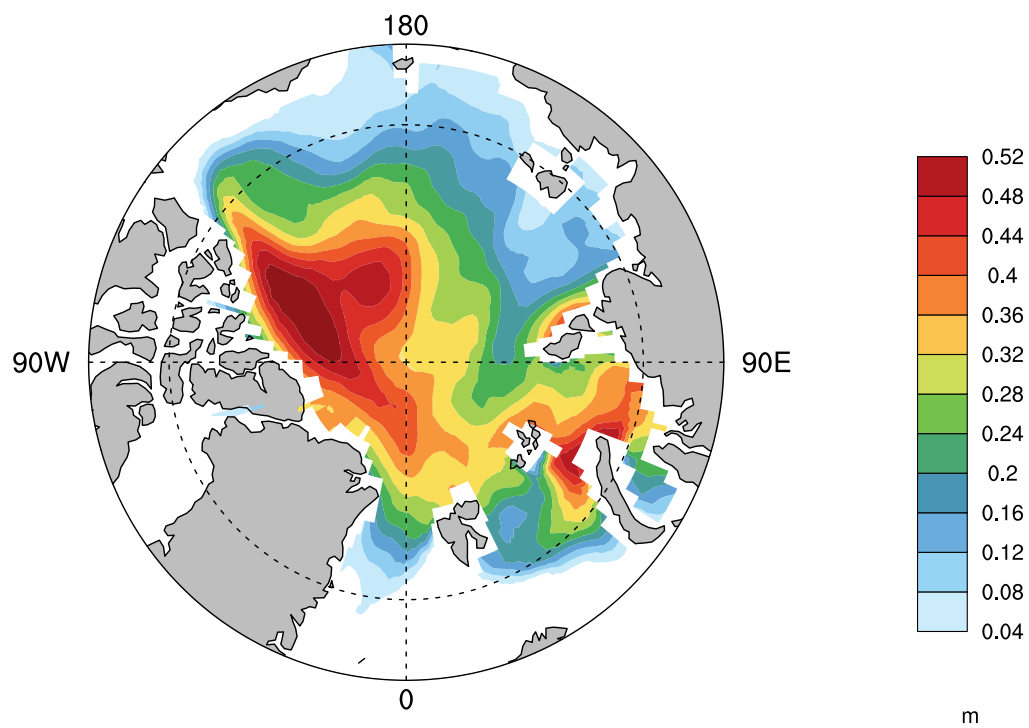

**Figure S3.** CESM JRA-55 snow on sea ice depth on 1 June, 2003 (m).

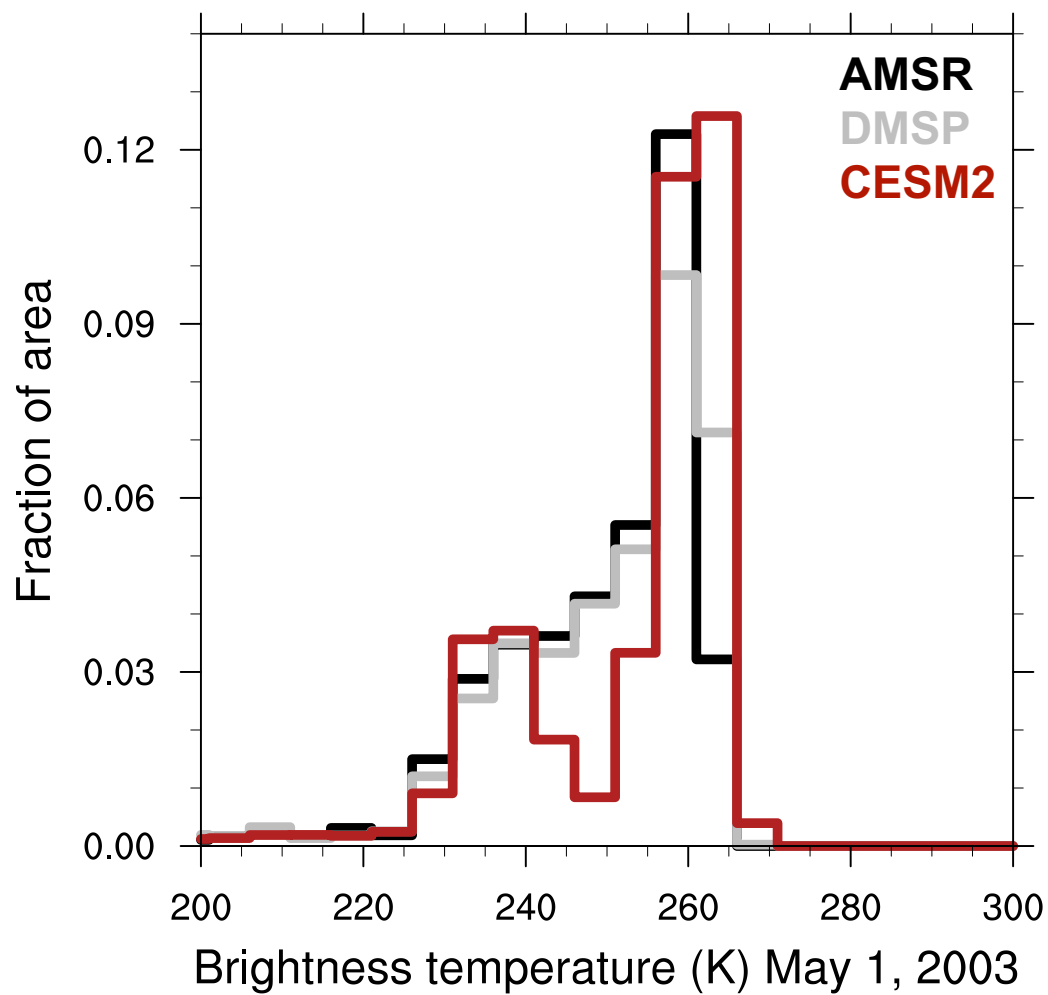

**Figure S4.** Areal distributions of brightness temperatures (K) over 66-84.5 °N from AMSR (black), DMSP (grey) and CESM2 JRA-55 (red) shown on on 1 May, 2003, near the timing of the earliest melt estimation dates show in Fig. 7.
